# Supplementary material for: Impact of continuing medical education in cancer diagnosis on GP knowledge, attitude and readiness to investigate – a before-after study
Source: Springer Nature journal article supplement (doi:10.1186/s12875-016-0496-x), 2016-07-26
Supplement: MOESM1 [file 10520906]

**Additional File 1** Evidence for the most appropriate response (MAR), the predefined MAR range and the MAR test area to each of the knowledge items

| Knowledge items                                                                                                                                                                                 | Evidence for most appropriate response                                                                                                                                                                                                                                                                                                                                                                                                                                                                                                                                                                                                                                                                                                                                                                                                                                                                                                                                                                                                                                                                                                                                                                                                                                                                                                            | MAR | MAR range | MAR test area |
|-------------------------------------------------------------------------------------------------------------------------------------------------------------------------------------------------|---------------------------------------------------------------------------------------------------------------------------------------------------------------------------------------------------------------------------------------------------------------------------------------------------------------------------------------------------------------------------------------------------------------------------------------------------------------------------------------------------------------------------------------------------------------------------------------------------------------------------------------------------------------------------------------------------------------------------------------------------------------------------------------------------------------------------------------------------------------------------------------------------------------------------------------------------------------------------------------------------------------------------------------------------------------------------------------------------------------------------------------------------------------------------------------------------------------------------------------------------------------------------------------------------------------------------------------------------|-----|-----------|---------------|
| What is the likelihood that a 50-year-old patient having cancer at the time you choose to refer the patient to a cancer fast-track pathway?                                                     | <p><b><u>Evidence for cancer symptoms' PPVs:</u></b><br/> <b>Hamilton W. Br J Cancer 2009.</b> The CAPER studies: five case-control studies aimed at identifying and quantifying the risk of cancer in symptomatic primary care patients. <b>3-8%</b><br/>                     The actual risk of cancer when the GP refers might be higher than the symptoms PPV since the patient could present more signs. If the PPV for cancer is over 5-10% the patient perhaps should have been referred at an earlier time point.</p> <p><b><u>Evidence for PPV for diagnosing cancer in fast track referrals:</u></b><br/> <b>Meechan et al. Br J Gen Pract. 2012:</b> Variation in use of the 2-week referral pathway for suspected cancer: a cross-sectional analysis. All cancer types: <b>9-14%</b><br/> <b>Guldbrandt et al. PLoS One 2014:</b> Implementing Direct Access to Low-Dose Computed Tomography in General Practice—Method, Adaption and Outcome. <b>10.2%</b> (Lung cancer)<br/> <b><u>Evidence for PPV for diagnosing cancer in fast track referral for a 50-year-old patient.</u></b><br/> <b>Baughan. Br J Gen Pract. 2011:</b> Urgent suspected cancer referrals from general practice: audit of compliance with guidelines and referral outcomes.<br/>                     40-49 years: <b>8.6%</b>, 50-59 years: <b>14.3%</b></p> | 5%  | 2-10%     | 2% ≥R≤ 10%    |
| What is the likelihood that a patient aged 40 years or more, who is smoker, has lung cancer the second time s/he presents with haemoptysis in your practice?                                    | <p><b><u>Evidence for PPV of a repeated cancer symptom for lung cancer:</u></b><br/>                     Hamilton W. MD thesis, 2005: Towards earlier diagnosis of cancer in primary care: a population-based case-control study of colorectal, lung and prostate cancer. <b>12%</b></p>                                                                                                                                                                                                                                                                                                                                                                                                                                                                                                                                                                                                                                                                                                                                                                                                                                                                                                                                                                                                                                                          | 12% | 5-20%     | 5% ≥R≤20%     |
| What is the likelihood that a patient aged 40 years or more has colorectal cancer the first time that s/he presents with unintended weight loss and new onset of constipation in your practice? | <p><b><u>Evidence for PPV of combined cancer symptoms for colorectal cancer:</u></b><br/>                     Hamilton W. BJC 2009: The CAPER studies: five case-control studies aimed at identifying and quantifying the risk of cancer in symptomatic primary care patients. <b>3%</b></p>                                                                                                                                                                                                                                                                                                                                                                                                                                                                                                                                                                                                                                                                                                                                                                                                                                                                                                                                                                                                                                                      | 3%  | 2-6%      | 2% ≥ R≤ 6%    |
| What is the likelihood that a lung cancer cannot be detected on a chest x-ray at the time of diagnosis?                                                                                         | <p><b><u>Evidence for risk of negative chest X-ray despite lung cancer</u></b><br/>                     Bjerager. PhD thesis: Delay in diagnosis and treatment of lung cancer. <b>18%</b><br/>                     Stapley et al: Negative chest X-rays in primary care patients with lung cancer. Br J Gen Pract. 2006 <b>23%</b><br/>                     Quekel et al. Chest 1999: Miss rate of lung cancer on the chest radiograph in clinical practice. <b>19%</b></p>                                                                                                                                                                                                                                                                                                                                                                                                                                                                                                                                                                                                                                                                                                                                                                                                                                                                       | 20% | 15-25%    | R≥ 15%        |
| What is the proportion of patients with colorectal cancer who presented an alarm symptom as the first sign of the disease to his/her general practitioner?                                      | <p><b><u>Evidence for initial symptom presentation for cancer patients</u></b><br/>                     Nielsen et al. Ugeskr. Læger [Weekly Journal for Physicians (Danish medical journal)].2010: Symptom presentation in cancer patients in general practice. <b>49%</b></p>                                                                                                                                                                                                                                                                                                                                                                                                                                                                                                                                                                                                                                                                                                                                                                                                                                                                                                                                                                                                                                                                   | 49% | 40-60%    | R≤ 60%        |
| What is the proportion of patients with ovarian cancer who can be detected by a pelvic examination in general practice at the time of diagnosis?                                                | <p><b><u>Evidence for that pelvic examination is not useful to exclude the risk of ovarian cancer</u></b><br/>                     Hamilton et al. BMJ 2009: Risk of ovarian cancer in women with symptoms in primary care: population based case-control study. <b>33%</b></p>                                                                                                                                                                                                                                                                                                                                                                                                                                                                                                                                                                                                                                                                                                                                                                                                                                                                                                                                                                                                                                                                   | 33% | 25-41%    | R≤ 41%        |
